# Supplementary material for: Prospective study on intracranial pressure waveform morphology and its relationship with the development of obesity in rats
Source: Research Square preprint supplement (doi:10.21203/rs.3.rs-353495/v1), 2021-03-24
Supplement: Supplementary file 1 [file 4ed87b5d47d97f1f6d08d5ed.docx]

Prospective study on intracranial pressure waveform morphology and its relationship with the development of obesity in rats

Diego Adorna Marine*1, João Manoel Alves1, Marcela Sene-Fiorese1, Cristina Arrais2, Stela Marcia Matiello2, Jeferson Ancelmo Teixera1, Vanessa de Oliveira Furino1, Carla Nascimento dos Santos Rodrigues1, Ricardo Carneiro Borra3, Ana Claudia Garcia de Oliveira Duarte1

1. Federal University of São Carlos, Interinstitutional Graduate Program in Physiological Sciences, Department of Physical Education and Human Motricity, Biological Sciences Center, São Carlos, Brazil

2. Federal University of São Carlos, Graduate Program in Physiotherapy, Department of Physiotherapy, Center for Biological Sciences, São Carlos, Brazil

3. Federal University of São Carlos, Graduate Program in Genetics, Department of Genetics, Center for Biological Sciences, São Carlos, Brazil

*diegomarine@gmail.com


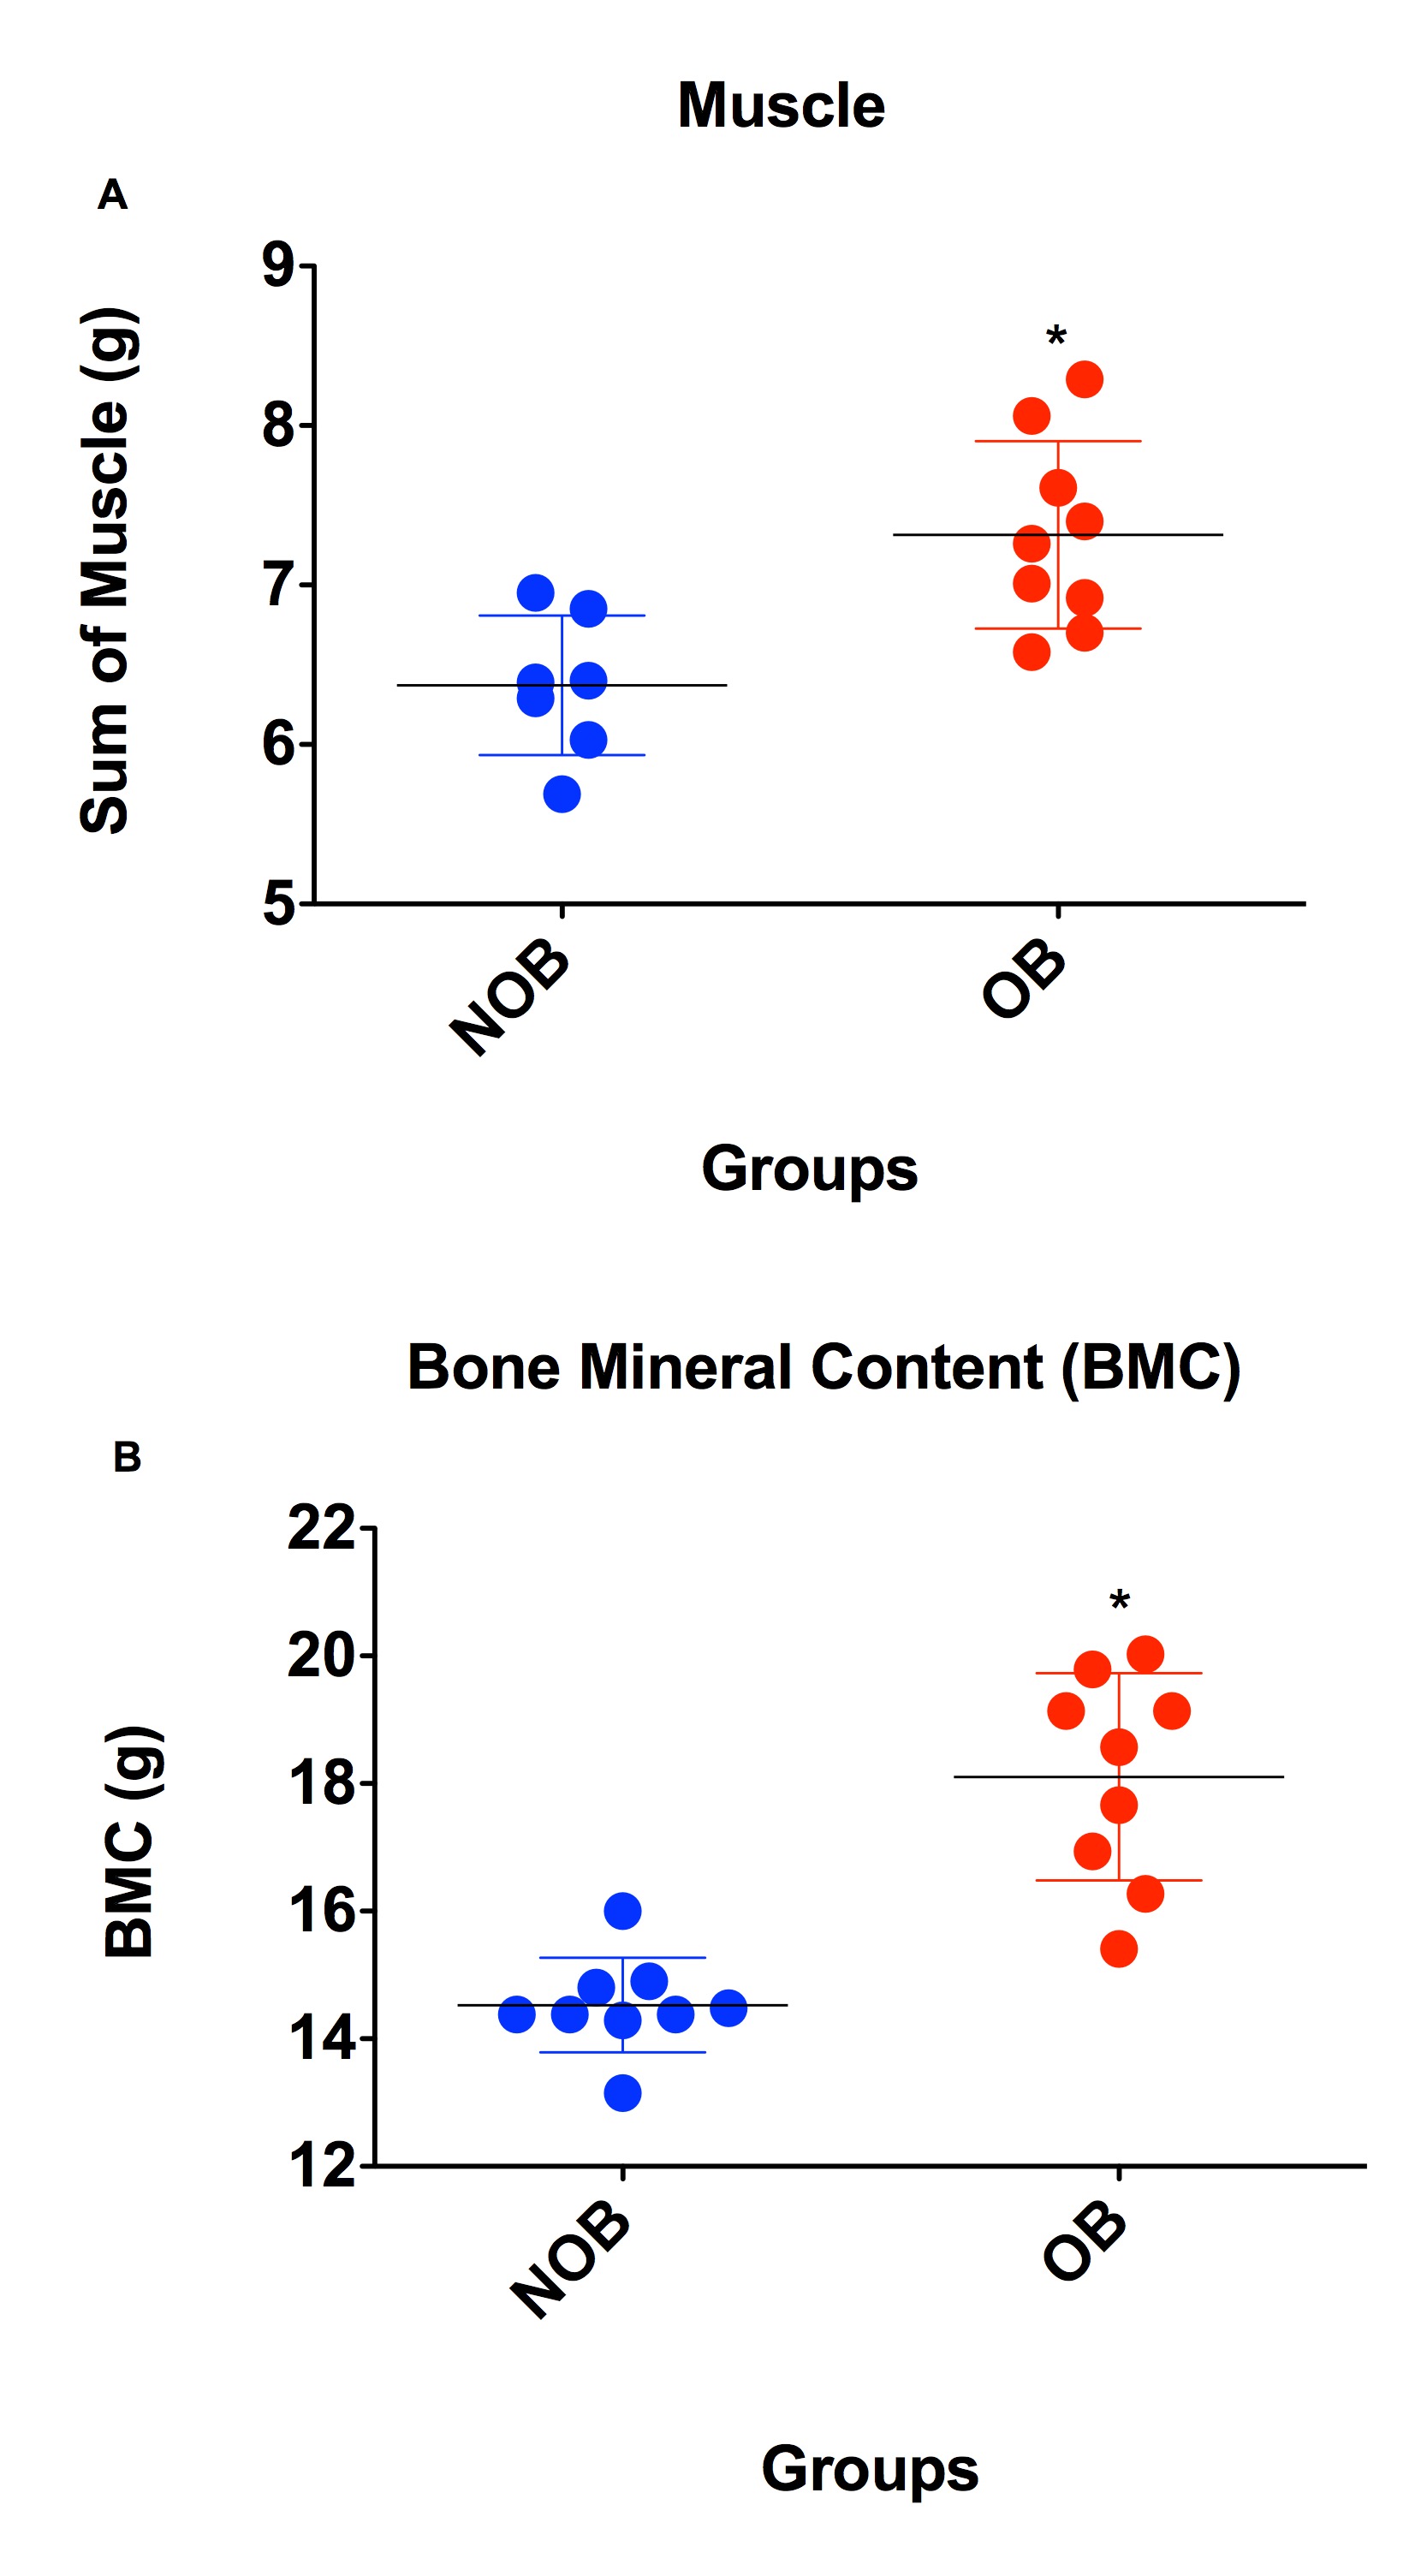


***Supplementary figure 1:*** NOB = Non Obese (blue); OB = Obese (red). 1A Sum of gastrocnemius, EDL and soleus muscles (right and left). 1B Bone Mineral Content (BMC). Independent t-Student test, *p <0.005.
